# Supplementary material for: Nanosized graphane (C1H1.14)n by hydrogenation of carbon nanofibers by Birch reduction method
Source: Royal Society of Chemistry journal article supplement (doi:10.1039/c5ra22077g), 2016-01-01
Supplement: c5ra22077g1.pdf [file c5ra22077g1.pdf]

ARTICLE

## Nanosized Graphane ( $C_1H_{1.14}$ )<sub>n</sub> by Hydrogenation of Carbon Nanofibers by Birch Reduction Method

Cite this: DOI: 10.1039/x0xx00000x

Daniel Bouša<sup>a</sup>, Jan Luxa<sup>a</sup>, David Sedmidubský<sup>a</sup>, Štěpán Huber<sup>a</sup>, Ondřej Jankovský<sup>a</sup>, Martin Pumera<sup>b,\*</sup>, Zdeněk Sofer<sup>a,\*</sup>

Received 00th January 2015,

Accepted 00th January 2015

DOI: 10.1039/x0xx00000x

## SUPPORTING INFORMATION

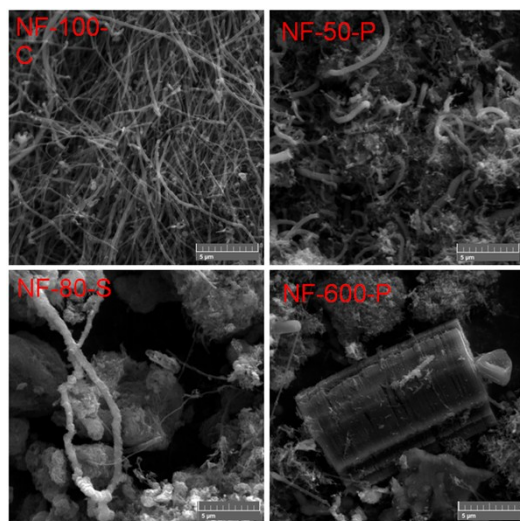

**Figure SI 1** The SEM images of graphite nanofibers used for hydrogenation. The scale bar corresponds to 1 μm.

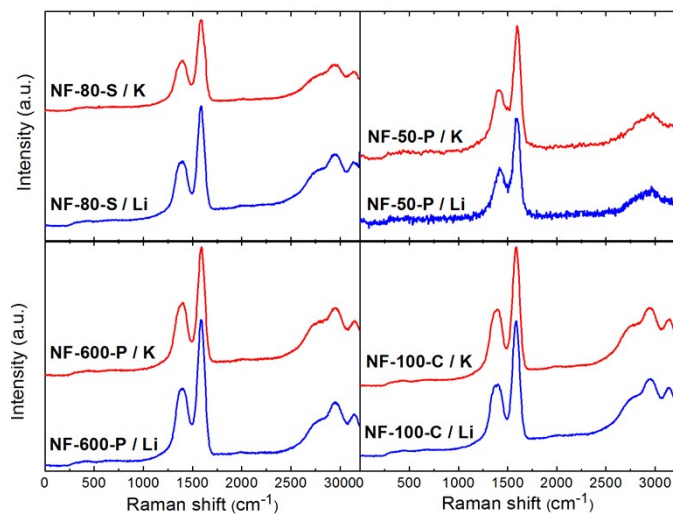

**Figure SI 2** The Raman spectra of hydrogenated graphite nanofibers measured with He-Cd laser (325 nm, 2 mW).

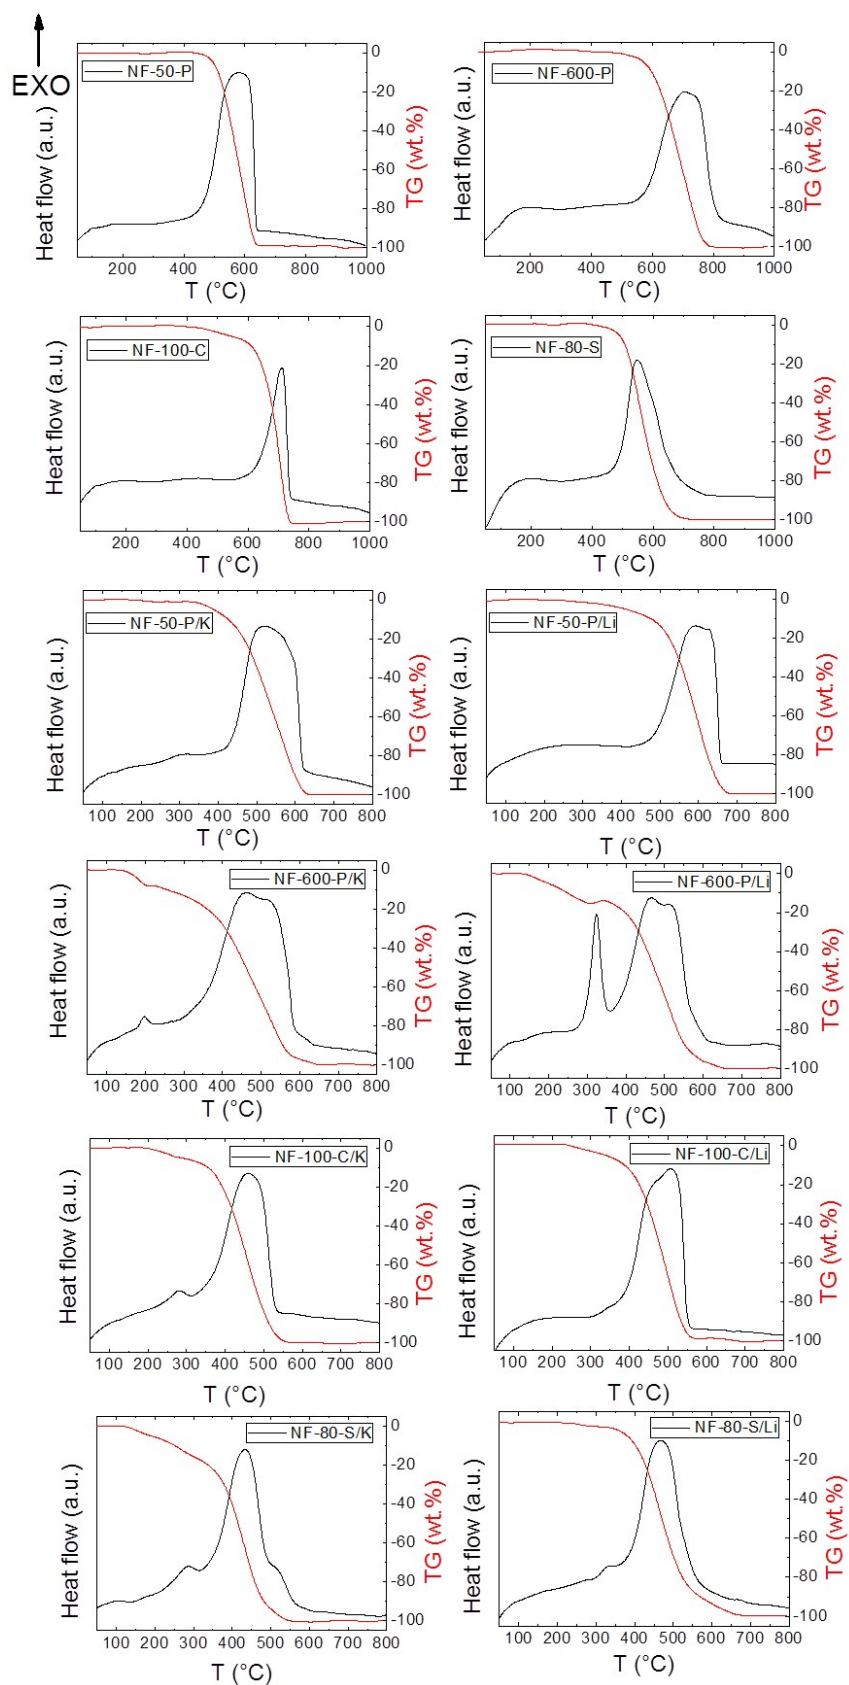

Figure SI 3 Simultaneous thermal analysis of graphanes and the starting materials in air atmosphere.

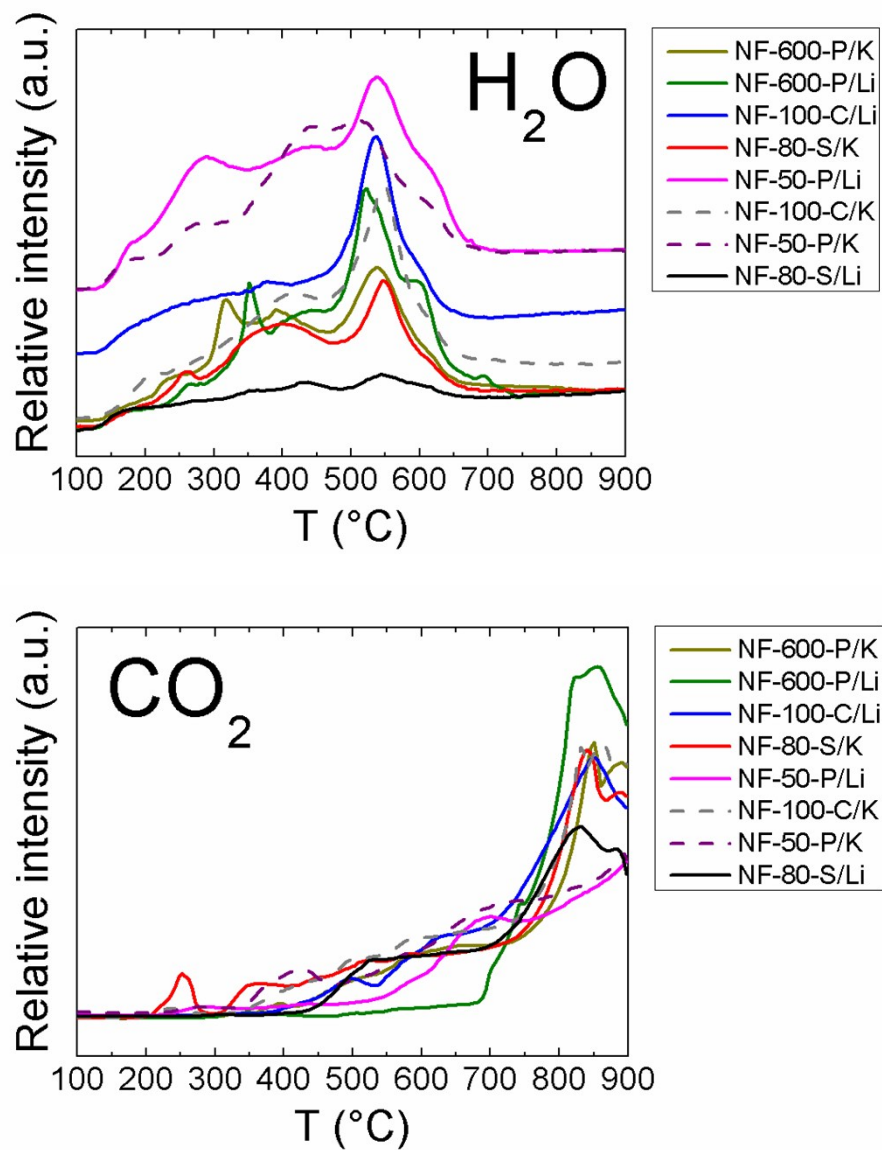

Figure SI 4 Temperature dependence of relative intensity of the evolved water and carbon dioxide.

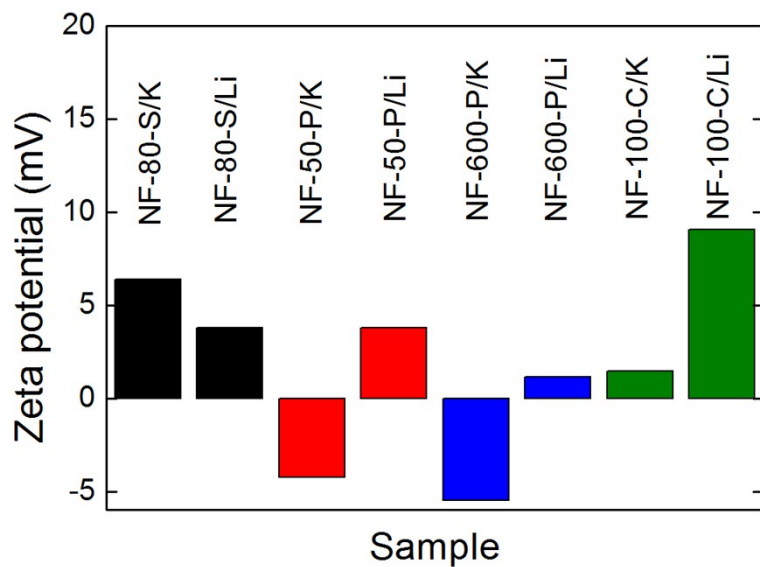

Figure SI 5 The  $\zeta$ -potential of hydrogenated graphite nanofibers.

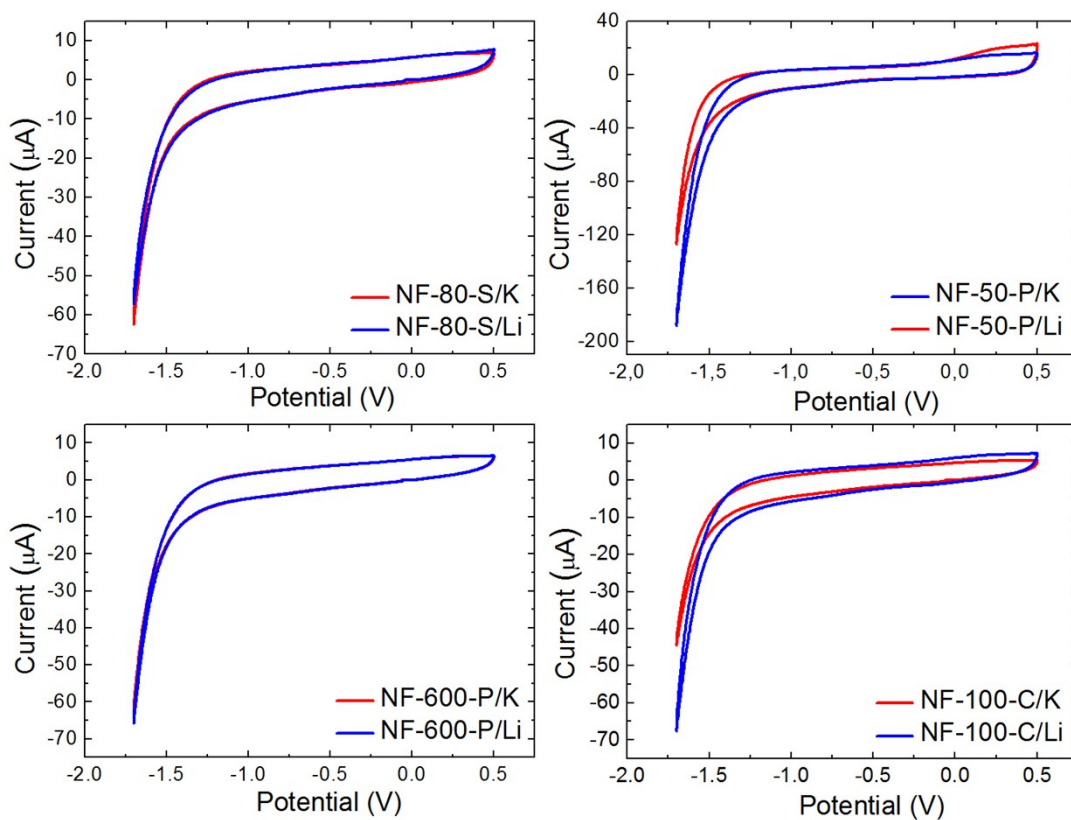

Figure SI 6 The inherent electrochemistry of hydrogenated graphite nanofibers. Measurement was performed in PBS ( $c=0.05$  M,  $\text{pH}=7.2$ ).

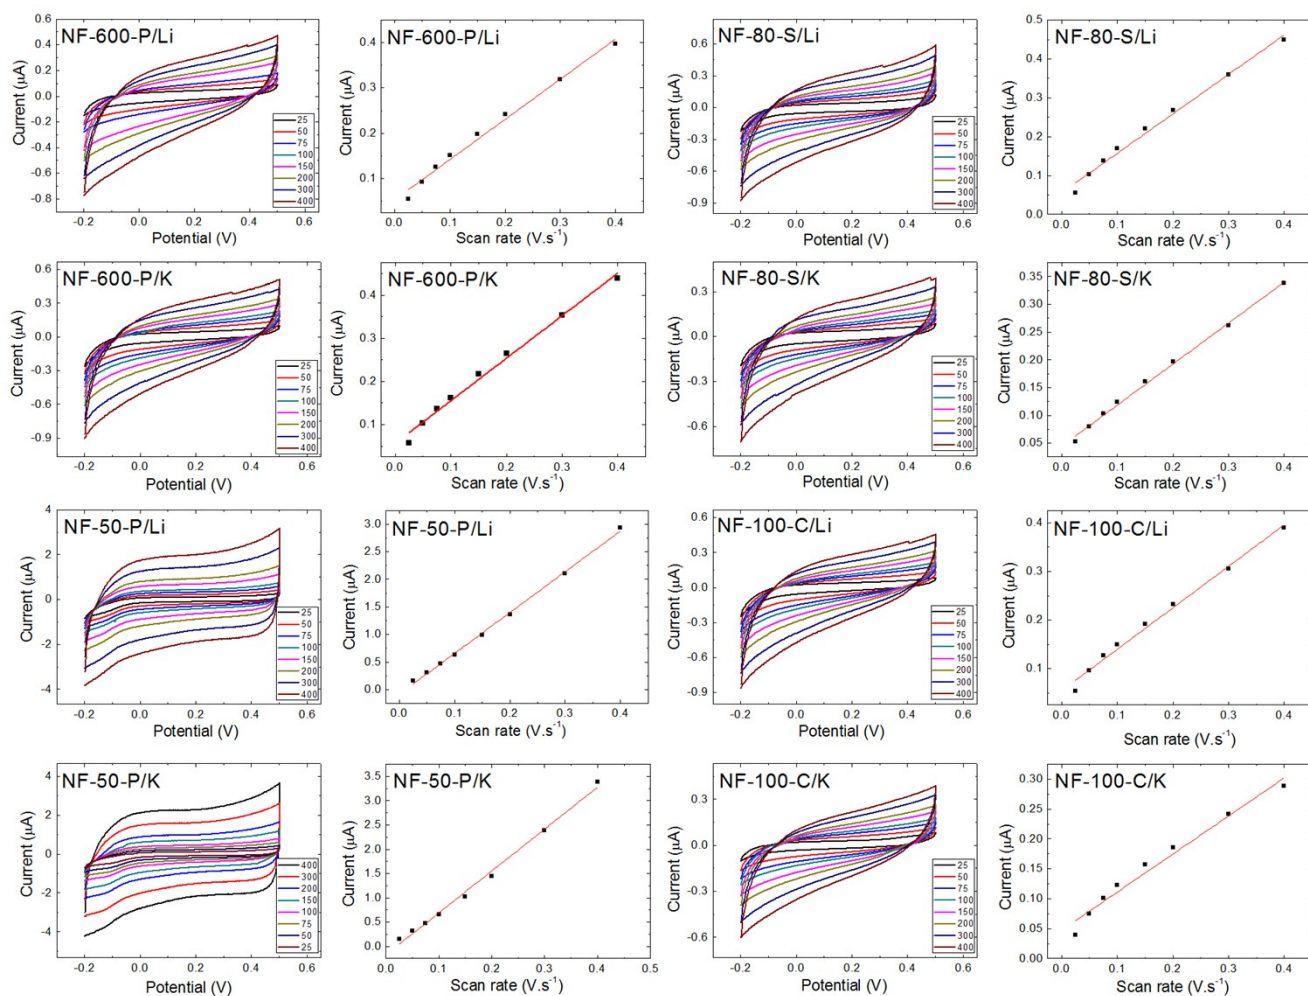

**Figure SI 7** The cyclic voltammograms at different scan rate in the range of 25 to 400  $\text{mV}\cdot\text{s}^{-1}$  and the corresponding dependence of current on the scan rate. Measurement was performed in PBS ( $c=0.05$  M,  $\text{pH}=7.2$ ).
